# Supplementary material
Source: PubMed Central journal article supplement (PMC7979525)

---

**Supplementary information**

---

**A growth-factor-activated lysosomal K channel regulates Parkinson's pathology**

---

In the format provided by the authors and unedited

The Supplementary Figure contains original gel pictures used to make the figures.

Fig. 1f

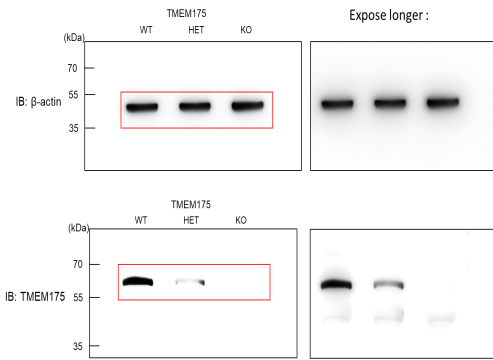

Fig. 2g

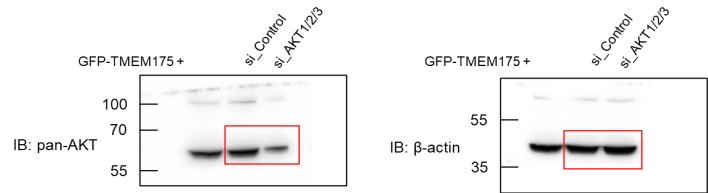

Fig. 3a

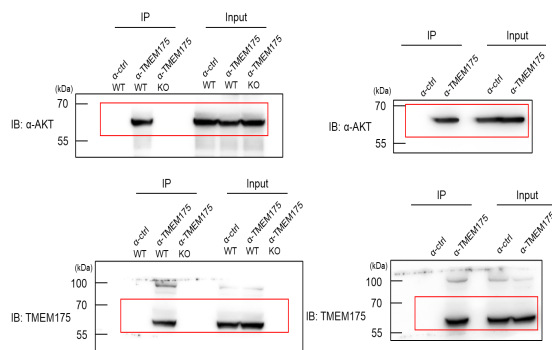

Fig. 3b

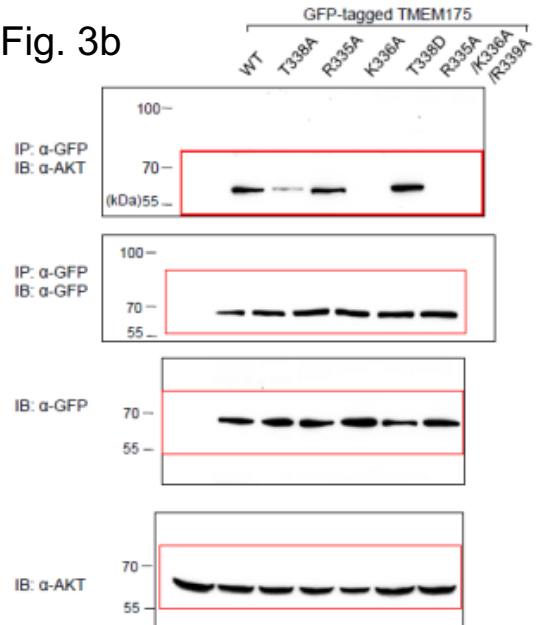

Fig. 3d

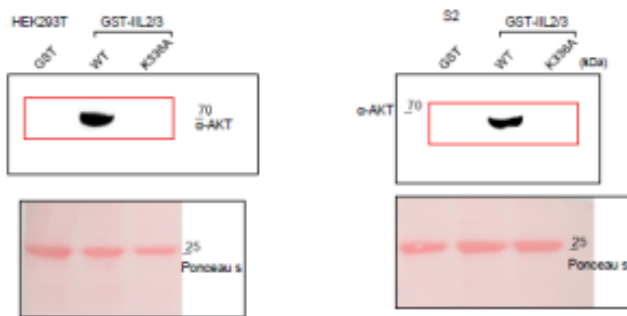

Fig. 4c

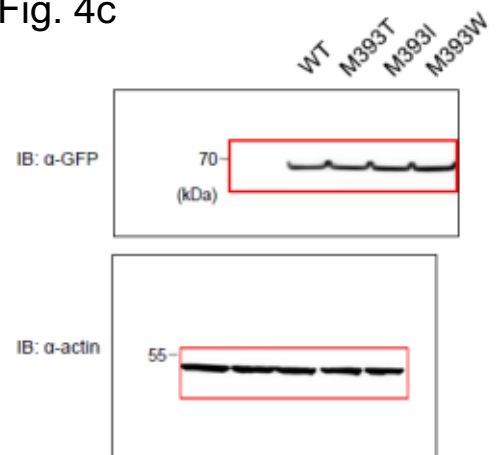

Extended Data Fig. 2d

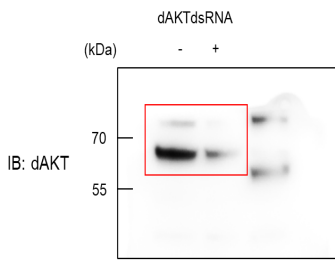

Extended Data Fig. 4a

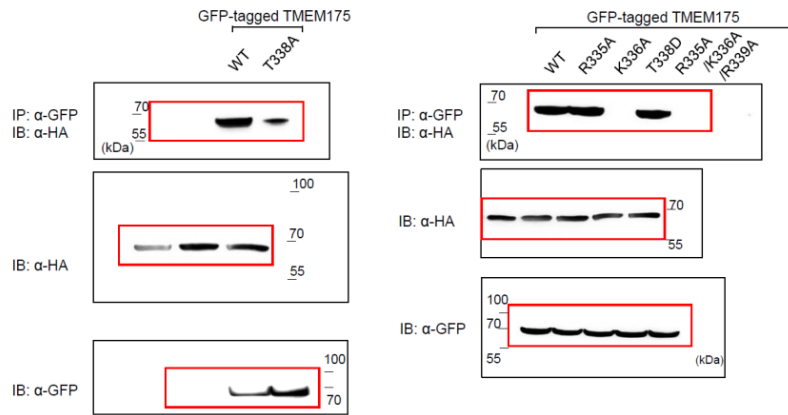

Extended Data Fig. 4d

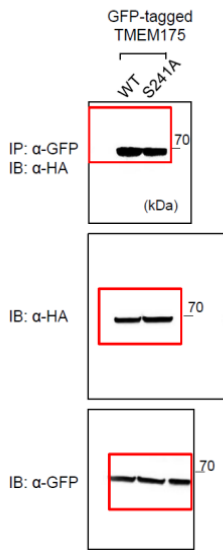

Extended Data Fig. 4e

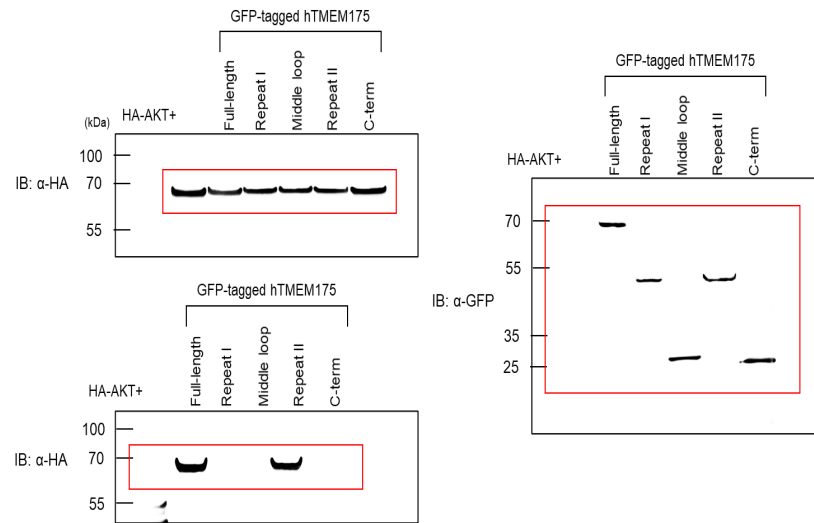

Extended Data Fig. 4g

Extended Data Fig. 4f

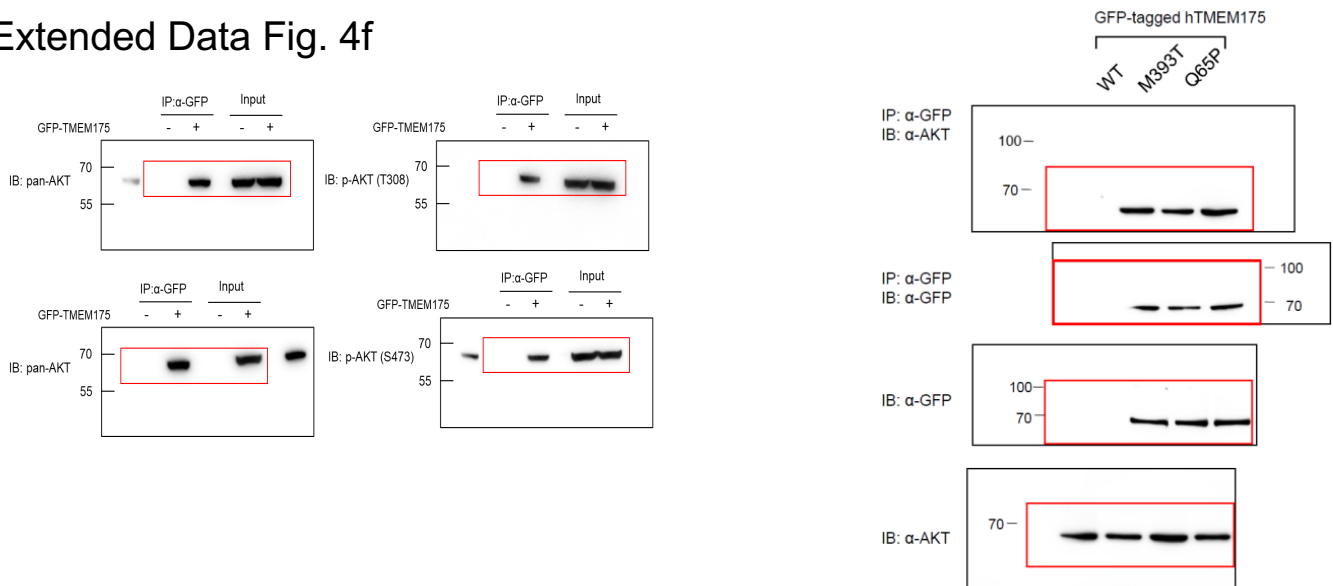

# Extended Data Fig. 5b

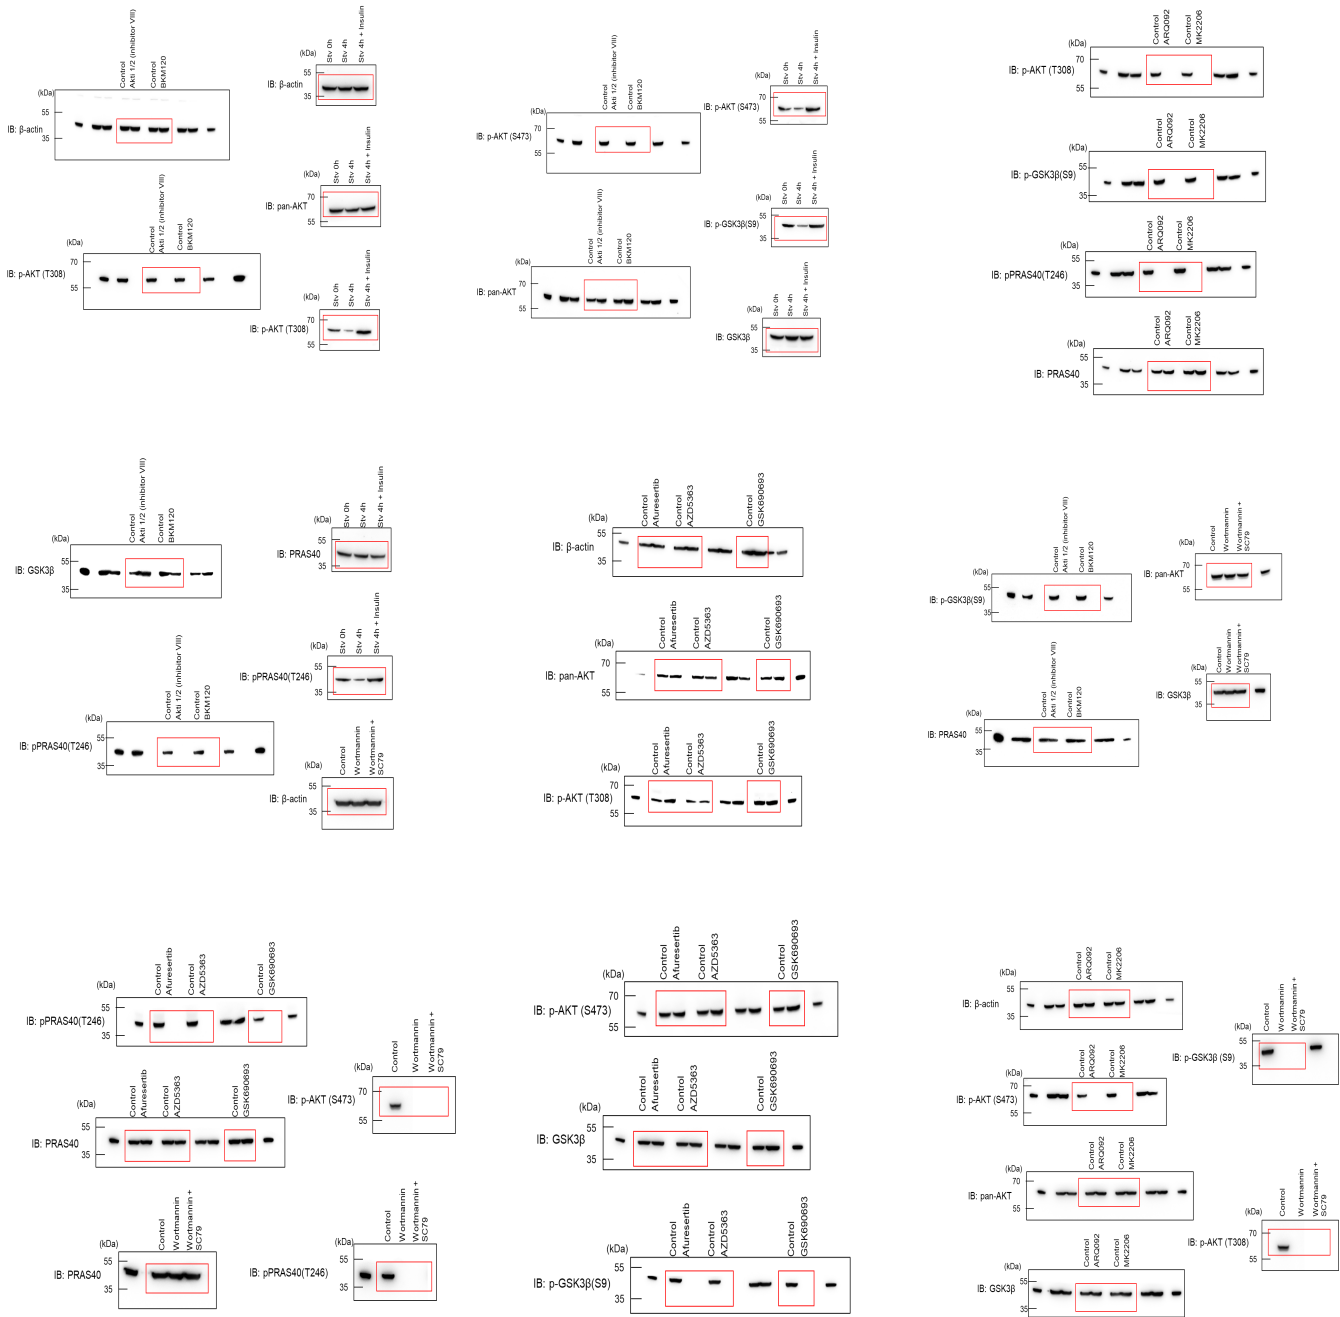

# Extended Data Fig. 6a

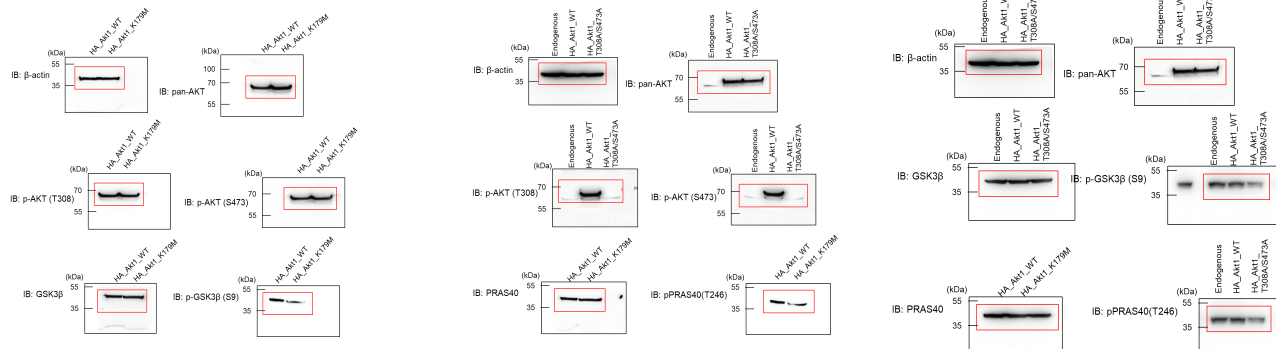

Extended Data Fig. 7b

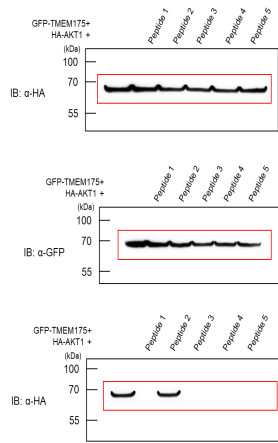

Extended Data Fig. 8f

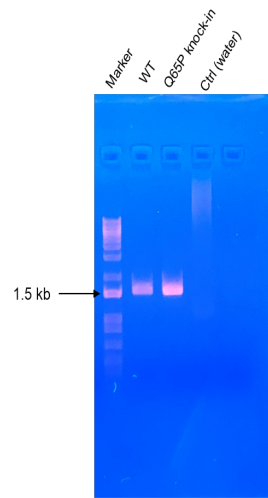

Extended Data Fig. 9b

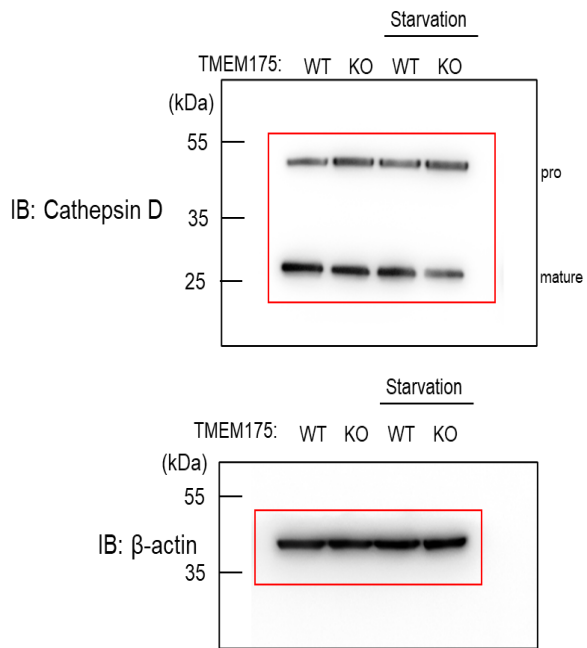

Supplement: NIHMS1670145-supplement-supplementary_material_1.pdf [file NIHMS1670145-supplement-supplementary_material_1.pdf]
