# Supplementary material
Source: PubMed Central journal article supplement (PMC7979525)
Supplement: NIHMS1670145-supplement-supplementary_material_2.pdf [file NIHMS1670145-supplement-supplementary_material_2.pdf]

## Reporting Summary

Nature Research wishes to improve the reproducibility of the work that we publish. This form provides structure for consistency and transparency in reporting. For further information on Nature Research policies, see [Authors & Referees](#) and the [Editorial Policy Checklist](#).

### Statistics

For all statistical analyses, confirm that the following items are present in the figure legend, table legend, main text, or Methods section.

n/a Confirmed

- The exact sample size ( $n$ ) for each experimental group/condition, given as a discrete number and unit of measurement
- A statement on whether measurements were taken from distinct samples or whether the same sample was measured repeatedly
- The statistical test(s) used AND whether they are one- or two-sided  
*Only common tests should be described solely by name; describe more complex techniques in the Methods section.*
- A description of all covariates tested
- A description of any assumptions or corrections, such as tests of normality and adjustment for multiple comparisons
- A full description of the statistical parameters including central tendency (e.g. means) or other basic estimates (e.g. regression coefficient) AND variation (e.g. standard deviation) or associated estimates of uncertainty (e.g. confidence intervals)
- For null hypothesis testing, the test statistic (e.g.  $F$ ,  $t$ ,  $r$ ) with confidence intervals, effect sizes, degrees of freedom and  $P$  value noted  
*Give  $P$  values as exact values whenever suitable.*
- For Bayesian analysis, information on the choice of priors and Markov chain Monte Carlo settings
- For hierarchical and complex designs, identification of the appropriate level for tests and full reporting of outcomes
- Estimates of effect sizes (e.g. Cohen's  $d$ , Pearson's  $r$ ), indicating how they were calculated

*Our web collection on [statistics for biologists](#) contains articles on many of the points above.*

### Software and code

Policy information about [availability of computer code](#)

Data collection

pClamp (version 10.4, Molecular Device), ImSpector Microscope Controller (Version 144, LaVision Biotec)

Data analysis

Clampfit (version 10.4, Molecular Device), Origin (version 8.0, Origin Lab), Imaris (version 8.0, Oxford Instruments), ImageJ (version 1.53a, US NIH), R (RStudio, Version 1.1.456)

For manuscripts utilizing custom algorithms or software that are central to the research but not yet described in published literature, software must be made available to editors/reviewers. We strongly encourage code deposition in a community repository (e.g. GitHub). See the Nature Research [guidelines for submitting code & software](#) for further information.

### Data

Policy information about [availability of data](#)

All manuscripts must include a [data availability statement](#). This statement should provide the following information, where applicable:

- Accession codes, unique identifiers, or web links for publicly available datasets
- A list of figures that have associated raw data
- A description of any restrictions on data availability

All relevant data and code are freely available from the authors. Figures 1-5 and Extended Data Figures 1-10 have raw data.

Parkinson's Progression Markers Initiative (PPMI) database: <https://www.ppmi-info.org/access-data-specimens/>, Genome Aggregation Database (gnomAD): <https://gnomad.broadinstitute.org/>, PD Gene database: <http://www.pdgene.org/>, PDB ID 6WCA: <https://www.rcsb.org/structure/6WCA>.

## Field-specific reporting

Please select the one below that is the best fit for your research. If you are not sure, read the appropriate sections before making your selection.

Life sciences       Behavioural & social sciences       Ecological, evolutionary & environmental sciences

For a reference copy of the document with all sections, see [nature.com/documents/nr-reporting-summary-flat.pdf](https://www.nature.com/documents/nr-reporting-summary-flat.pdf)

## Life sciences study design

All studies must disclose on these points even when the disclosure is negative.

|                 |                                                                                                                                                                                                                                                                                                                                                |
|-----------------|------------------------------------------------------------------------------------------------------------------------------------------------------------------------------------------------------------------------------------------------------------------------------------------------------------------------------------------------|
| Sample size     | Sample sizes were not predetermined using statistical methods; they are chosen based on statistical analysis and standards in the field (e.g. Cang et. al. (2015) Cell 162:1101-12). See sections "Statistical analysis of clinical data" and "Other statistical information".                                                                 |
| Data exclusions | No data were excluded from analyses.                                                                                                                                                                                                                                                                                                           |
| Replication     | All experiments were independently replicated at least in two independent preparations for electrophysiology and three times for protein chemistry experiments. See section "Other statistical information and reproducibility".                                                                                                               |
| Randomization   | Mice used in the behavioral studies were randomized. The electrophysiological and protein chemistry experiments were not as some of them are hard to be randomized.                                                                                                                                                                            |
| Blinding        | We did blind experiments for Fig. 1b, 1i (left panel), 2i(starvation experiment), 4d-f, 5a-d, Extended data Fig. 1a, Extended data Fig. 1d, Extended data Fig. 1e, Extended data Fig. 8b-d, Extended data Fig. 9a, Extended data Fig. 9c-e and Extended data Fig. 10a-e. The others were not blinded as blinding unlikely affects the results. |

## Reporting for specific materials, systems and methods

We require information from authors about some types of materials, experimental systems and methods used in many studies. Here, indicate whether each material, system or method listed is relevant to your study. If you are not sure if a list item applies to your research, read the appropriate section before selecting a response.

### Materials & experimental systems

### Methods

| n/a                                 | Involvement in the study                                        | n/a                                 | Involvement in the study                        |
|-------------------------------------|-----------------------------------------------------------------|-------------------------------------|-------------------------------------------------|
| <input type="checkbox"/>            | <input checked="" type="checkbox"/> Antibodies                  | <input checked="" type="checkbox"/> | <input type="checkbox"/> ChIP-seq               |
| <input type="checkbox"/>            | <input checked="" type="checkbox"/> Eukaryotic cell lines       | <input checked="" type="checkbox"/> | <input type="checkbox"/> Flow cytometry         |
| <input checked="" type="checkbox"/> | <input type="checkbox"/> Palaeontology                          | <input checked="" type="checkbox"/> | <input type="checkbox"/> MRI-based neuroimaging |
| <input type="checkbox"/>            | <input checked="" type="checkbox"/> Animals and other organisms |                                     |                                                 |
| <input type="checkbox"/>            | <input checked="" type="checkbox"/> Human research participants |                                     |                                                 |
| <input checked="" type="checkbox"/> | <input type="checkbox"/> Clinical data                          |                                     |                                                 |

## Antibodies

### Antibodies used

β-actin (rabbit monoclonal, Cell Signaling Technology, #4970, 1:3000),  
 GFP (mouse monoclonal, Thermo Fisher Scientific, #A11120 1:1000; mouse monoclonal, Santa Cruz Biotechnology, #sc-9996, 1:2000),  
 TMEM175 (rabbit polyclonal, Proteintech, #19925-1-AP 1:1000; rabbit polyclonal, Origene, #TA335429, 2 µg/ml),  
 Akt (rabbit polyclonal, Cell Signaling Technology, #9272, 1:1000),  
 pan-Akt (mouse monoclonal, R&D Systems, #MAB2055, 0.2 µg/ml),  
 HA (mouse monoclonal, Santa Cruz Biotechnology, #sc-7392, 1:1000),  
 phospho-Akt (Ser473) (rabbit polyclonal, Cell Signaling Technology, #9271, 1:2000),  
 phospho-Akt (Thr308) (rabbit monoclonal, Cell Signaling Technology, #4056, 1:1000),  
 phospho-GSK3β (Ser9) (rabbit monoclonal, Cell Signaling Technology, #9323, 1:1000),  
 GSK3β (rabbit monoclonal, Cell Signaling Technology, #9315, 1:1000),  
 phospho-PRAS40(T246) (rabbit monoclonal, Cell Signaling Technology, #2691, 1:1000),  
 PRAS40 (rabbit monoclonal, Cell Signaling Technology, #2997, 1:1000),  
 cathepsin D (rabbit polyclonal, Cell Signaling Technology, #2284, 1:200),  
 rabbit IgG (Cell Signaling Technology, #7074, 1:4000),  
 mouse IgG (Abcam, #ab131368, 1:1000; Cell Signaling Technology, #7076, 1:4000),  
 VeritBlot for IP detection reagent (HRP) (Abcam, #ab131366, 1:4000),  
 pSer129 α-synuclein (mouse clone mAb 81A, 1:8000 {Waxman, 2008 #3214})  
 galectin-3 (rat monoclonal, 1:100, Santa Cruz Biotechnology, #sc-81728).  
 Alexa Fluor 594-conjugated goat anti-mouse secondary antibody (Thermo Fisher Scientific, #A-11032, 2 µg/ml)

Alexa Fluor 488-conjugated rabbit anti- $\alpha$ -tubulin antibody (Cell Signaling Technology, #5063S, 1:200),  
 Alexa Fluor 488 conjugated rabbit anti-rat secondary antibody (Thermo Fisher Scientific, #A-21210, 2  $\mu$ g/ml).  
 DAT (rat monoclonal, Santa Cruz Biotechnology, #sc-32258, 1:500)  
 TH (rabbit polyclonal, Millipore Sigma, #AB-152, 1:500),  
 Alexa Fluor-conjugated secondary antibody (goat anti-rat IgG, Alexa 647, Thermo Fisher Scientific, #A21247, 1:500),  
 Alexa Fluor-conjugated secondary antibody (goat anti-rabbit IgG Alexa 647 (Thermo Fisher Scientific, #A21245, 1:500),  
 Tyrosine hydroxylase (Millipore Sigma, #TH-16; 1:5,000),  
 NeuN (Millipore Sigma, #A60; 1:1,000),  
 biotinylated anti-mouse IgG (1:1,000; Vector Laboratories, #BA2000),

## Validation

$\beta$ -actin (rabbit monoclonal, Cell Signaling Technology, #4970, 1:3000), <https://www.cellsignal.com/products/primary-antibodies/b-actin-13e5-rabbit-mab/4970>  
 GFP (mouse monoclonal, Thermo Fisher Scientific, #A11120 1:1000), <https://www.thermofisher.com/antibody/product/GFP-Antibody-clone-3E6-Monoclonal/A-11120>, validated against non-transfected cells.  
 GFP (mouse monoclonal, Santa Cruz Biotechnology, #sc-9996, 1:2000), <https://www.scbt.com/p/gfp-antibody-b-2>, validated against non-transfected cells.  
 TMEM175 (rabbit polyclonal, Proteintech, #19925-1-AP 1:1000), <https://www.ptglab.com/products/TMEM175-Antibody-19925-1-AP.htm>, validated against knockout.  
 TMEM175 (rabbit polyclonal, Origene, #TA335429, 2  $\mu$ g/ml), <https://www.origene.com/catalog/antibodies/primary-antibodies/ta335429/transmembrane-protein-175-tmем175-rabbit-polyclonal-antibody>, validated against knockout.  
 Akt (rabbit polyclonal, Cell Signaling Technology, #9272, 1:1000), <https://www.cellsignal.com/products/primary-antibodies/akt-antibody/9272>  
 pan-Akt (mouse monoclonal, R&D Systems, #MAB2055, 0.2  $\mu$ g/ml), [https://www.rndsystems.com/products/human-mouse-rat-akt-pan-specific-antibody-281046\\_mab2055](https://www.rndsystems.com/products/human-mouse-rat-akt-pan-specific-antibody-281046_mab2055)  
 HA (mouse monoclonal, Santa Cruz Biotechnology, #sc-7392, 1:1000), <https://www.scbt.com/p/ha-probe-antibody-f-7>, validated against non-transfected cells.  
 phospho-Akt (Ser473) (rabbit polyclonal, Cell Signaling Technology, #9271, 1:2000), <https://www.cellsignal.com/products/primary-antibodies/phospho-akt-ser473-antibody/9271>, validated against starved cells.  
 phospho-Akt (Thr308) (rabbit monoclonal, Cell Signaling Technology, #4056, 1:1000), <https://www.cellsignal.com/products/primary-antibodies/phospho-akt-thr308-244f9-rabbit-mab/4056>, validated against starved cells.  
 phospho-GSK3 $\beta$  (Ser9) (rabbit monoclonal, Cell Signaling Technology, #9323, 1:1000), <https://www.cellsignal.com/products/primary-antibodies/phospho-gsk-3b-ser9-5b3-rabbit-mab/9323>, validated against starved cells.  
 GSK3 $\beta$  (rabbit monoclonal, Cell Signaling Technology, #9315, 1:1000), <https://www.cellsignal.com/products/primary-antibodies/gsk-3b-27c10-rabbit-mab/9315>  
 phospho-PRAS40(T246) (rabbit monoclonal, Cell Signaling Technology, #2691, 1:1000), <https://www.cellsignal.com/products/primary-antibodies/pras40-d23c7-xp-rabbit-mab/2691>, validated against starved cells.  
 PRAS40 (rabbit monoclonal, Cell Signaling Technology, #2997, 1:1000), <https://www.cellsignal.com/products/primary-antibodies/phospho-pras40-thr246-c77d7-rabbit-mab/2997>  
 cathepsin D (rabbit polyclonal, Cell Signaling Technology, #2284, 1:200), <https://www.cellsignal.com/products/primary-antibodies/cathepsin-d-antibody/2284>  
 HRP conjugated rabbit IgG (Cell Signaling Technology, #7074, 1:4000), <https://www.cellsignal.com/products/secondary-antibodies/anti-rabbit-igg-hrp-linked-antibody/7074>  
 mouse IgG (Abcam, #ab131368, 1:1000; Cell Signaling Technology, #7076, 1:4000), <https://www.cellsignal.com/products/secondary-antibodies/anti-mouse-igg-hrp-linked-antibody/7076>  
 VeritBlot for IP detection reagent (HRP) (Abcam, #ab131366, 1:4000), <https://www.abcam.com/veriblot-for-ip-detection-reagent-hrp-ab131366.html>  
 pSer129  $\alpha$ -synuclein (mouse clone mAb 81A, 1:8000 (Waxman et al. Specificity and regulation of casein kinase-mediated phosphorylation of alpha-synuclein, J Neuropathol Exp Neurol. 2008 May;67(5):402-16. doi: 10.1097/NEN.0b013e31816fc995)  
 galectin-3 (rat monoclonal, 1:100, Santa Cruz Biotechnology, #sc-81728), <https://www.scbt.com/p/galectin-3-antibody-m3-38-1-2-8-hl-2>  
 Alexa Fluor 594-conjugated goat anti-mouse secondary antibody (Thermo Fisher Scientific, #A-11032, 2  $\mu$ g/ml), <https://www.thermofisher.com/antibody/product/Goat-anti-Mouse-IgG-H-L-Highly-Cross-Adsorbed-Secondary-Antibody-Polyclonal/A-11032>  
 Alexa Fluor 488-conjugated rabbit anti- $\alpha$ -tubulin antibody (Cell Signaling Technology, #5063S, 1:200), <https://www.cellsignal.com/products/antibody-conjugates/a-tubulin-11h10-rabbit-mab-alex-fluor-488-conjugate/5063?Ntk=Products&Ntt=5063>  
 Alexa Fluor 488 conjugated rabbit anti-rat secondary antibody (Thermo Fisher Scientific, #A-21210, 2  $\mu$ g/ml), <https://www.thermofisher.com/antibody/product/Rabbit-anti-Rat-IgG-H-L-Cross-Adsorbed-Secondary-Antibody-Polyclonal/A-21210>  
 DAT (rat monoclonal, Santa Cruz Biotechnology, #sc-32258, 1:500), <https://www.scbt.com/p/dat-antibody-6-5g10>  
 TH (rabbit polyclonal, Millipore Sigma, #AB-152, 1:500), [https://www.sigmaaldrich.com/catalog/product/mm/ab152?lang=en&region=US&gclid=Cj0KQCqIA-rj9BRCAARIsANB\\_4ADs7HEZA0dDtXlvjHo9R01UpsGTb3p-JbYAvodrrN-7bQnPVPE87BoaAjrZEALw\\_wcB](https://www.sigmaaldrich.com/catalog/product/mm/ab152?lang=en&region=US&gclid=Cj0KQCqIA-rj9BRCAARIsANB_4ADs7HEZA0dDtXlvjHo9R01UpsGTb3p-JbYAvodrrN-7bQnPVPE87BoaAjrZEALw_wcB)  
 Alexa Fluor-conjugated secondary antibody (goat anti-rat IgG, Alexa 647, Thermo Fisher Scientific, #A21247, 1:500), <https://www.thermofisher.com/antibody/product/Goat-anti-Rat-IgG-H-L-Cross-Adsorbed-Secondary-Antibody-Polyclonal/A-21247>  
 Alexa Fluor-conjugated secondary antibody (goat anti-rabbit IgG Alexa 647 (Thermo Fisher Scientific, #A21245, 1:500), <https://www.thermofisher.com/antibody/product/Goat-anti-Rabbit-IgG-H-L-Highly-Cross-Adsorbed-Secondary-Antibody-Polyclonal/A-21245>  
 Tyrosine hydroxylase (Millipore Sigma, #TH-16; 1:5,000), <https://www.bosterbio.com/anti-tyrosine-hydroxylase-antibody-mono-clonal-ma1100-boster.html>  
 NeuN (Millipore Sigma, #A60; 1:1,000), [https://www.emdmillipore.com/US/en/product/Anti-NeuN-Antibody-clone-A60,MM\\_NF-MAB377](https://www.emdmillipore.com/US/en/product/Anti-NeuN-Antibody-clone-A60,MM_NF-MAB377)  
 biotinylated anti-mouse IgG (1:1,000; Vector Laboratories, #BA2000), <https://vectorlabs.com/biotinylated-horse-anti-mouse-igg-antibody.html>

## Eukaryotic cell lines

Policy information about [cell lines](#)

|                                                                   |                                                                                                                                    |
|-------------------------------------------------------------------|------------------------------------------------------------------------------------------------------------------------------------|
| Cell line source(s)                                               | HEK293T and SH-SY5Y from ATCC and S2 cell from Gibco, described in section "Cell Culture".                                         |
| Authentication                                                    | The cell lines were purchased and authenticated by the providers (ATCC and Gibco); we did not carry out additional authentication. |
| Mycoplasma contamination                                          | HEK293T and SH-SY5Y from ATCC, and S2 cell from Gibco were tested by the providers.                                                |
| Commonly misidentified lines (See <a href="#">ICLAC</a> register) | No commonly misidentified cell line was used in this study.                                                                        |

## Animals and other organisms

Policy information about [studies involving animals](#); [ARRIVE guidelines](#) recommended for reporting animal research

|                         |                                                                                                                                                                                                                                                                                                                                                                                                                                                                                                                                                                                                                                                                                                                                                                                              |
|-------------------------|----------------------------------------------------------------------------------------------------------------------------------------------------------------------------------------------------------------------------------------------------------------------------------------------------------------------------------------------------------------------------------------------------------------------------------------------------------------------------------------------------------------------------------------------------------------------------------------------------------------------------------------------------------------------------------------------------------------------------------------------------------------------------------------------|
| Laboratory animals      | Wild-type and mutant mice (BL6 background) were used, as described in the section "Animals". Description of research mice used for each experiment can be found in the relevant figure legends. Neuronal cultures were made from P0 pups with genders undetermined. Brain proteins used for immunoprecipitation and Western blot were collected from 3-5 month old mice (mixture of male and females). Behavior and Immunostaining comparing WT and heterozygous littermates used mice of ~12 months old (both males and females). Immunostaining comparing WT and homozygous KO littermates used mice of 18-22 months old (both males and females). Average temperature in the housing rooms was 72 degree F; humidity was approximately 40%. Light cycle was 12 hours light/12 hours dark. |
| Wild animals            | No wild animal was used.                                                                                                                                                                                                                                                                                                                                                                                                                                                                                                                                                                                                                                                                                                                                                                     |
| Field-collected samples | No field-collected sample was used.                                                                                                                                                                                                                                                                                                                                                                                                                                                                                                                                                                                                                                                                                                                                                          |
| Ethics oversight        | Animal use was approved by the The University of Pennsylvania's IACUC, The Animal Care and Use Committee of the School of Medicine at Fudan University, The clinical studies were approved by The University of Pennsylvania (UPenn) Institutional Review Board                                                                                                                                                                                                                                                                                                                                                                                                                                                                                                                              |

Note that full information on the approval of the study protocol must also be provided in the manuscript.

## Human research participants

Policy information about [studies involving human research participants](#)

|                            |                                                                                                                                                                                                                                                                                                                                                                                                                                                                                                                                                                                                                                                                                                                                                                                                          |
|----------------------------|----------------------------------------------------------------------------------------------------------------------------------------------------------------------------------------------------------------------------------------------------------------------------------------------------------------------------------------------------------------------------------------------------------------------------------------------------------------------------------------------------------------------------------------------------------------------------------------------------------------------------------------------------------------------------------------------------------------------------------------------------------------------------------------------------------|
| Population characteristics | UPenn: Participants included male and female patients (defined as biological sex assigned at birth), 50 years of age and older, diagnosed with Parkinson's disease based on UK Brain Bank Criteria by a movement disorders neurologist, prospectively enrolled at the University of Pennsylvania Parkinson's Disease and Movement Disorders Center (Philadelphia, PA). See section "Human clinical studies". PPMI: Participants included people with a diagnosis of PD for two years or less who are not taking PD medications. Please see <a href="https://www.ppmi-info.org/study-design/study-cohorts/">https://www.ppmi-info.org/study-design/study-cohorts/</a> for more information.                                                                                                               |
| Recruitment                | UPenn: Participants were recruited by a movement disorders neurologist during a regularly schedule clinical office visit at the University of Pennsylvania Parkinson's Disease and Movement Disorders Center (Philadelphia, PA). All patients seen at the Parkinson's Disease and Movement Disorders Center with a diagnosis of Parkinson's disease were eligible to participate. Self-selection bias may be present in this cohort, although it is unlikely to have a significant impact on longitudinal cognitive or motor progression; Participants in this study were prospectively enrolled. See section "Human clinical studies". PPMI: Please see <a href="https://www.ppmi-info.org/study-design/study-cohorts/">https://www.ppmi-info.org/study-design/study-cohorts/</a> for more information. |
| Ethics oversight           | University of Pennsylvania (UPenn) Institutional Review Board                                                                                                                                                                                                                                                                                                                                                                                                                                                                                                                                                                                                                                                                                                                                            |

Note that full information on the approval of the study protocol must also be provided in the manuscript.
